# Supplementary material
Source: PubMed Central journal article supplement (PMC5741503)
Supplement: NIHMS902804-supplement-supplemental.pdf [file NIHMS902804-supplement-supplemental.pdf]

## **Telomerase enzyme deficiency promotes metabolic dysfunction in murine hepatocytes upon dietary stress**

Raquel M. Alves-Paiva<sup>1-3</sup>, Sachiko Kajigaya<sup>3</sup>, Xingmin Feng<sup>3</sup>, Jichun Chen<sup>3</sup>, Marie Desierto<sup>3</sup>, Susan Wong<sup>3</sup>, Danielle M. Townsley<sup>3</sup>, Flávia S. Donaires<sup>2</sup>, Adeline Bertola<sup>4</sup>, Bin Gao<sup>4</sup>, Neal S. Young<sup>3</sup>, Rodrigo T. Calado<sup>1,2</sup>

*Corresponding author:*

Rodrigo T. Calado, MD, PhD

Department of Internal Medicine, FMRP-USP

Av. Bandeirantes, 3900 – Lab. Hematologia, bloco G, subsolo – HCRP

Ribeirão Preto, 14049-900 SP, Brazil

Tel.: +(55)(16) 3602-2294 – Fax: +(55)(16) 3633-1144

E-mail: [rtcalado@fmrp.usp.br](mailto:rtcalado@fmrp.usp.br)

**Key words:** telomerase-deficient liver/metabolic dysfunction/high fat diet (HFD)/fatty liver

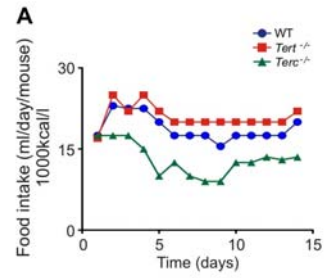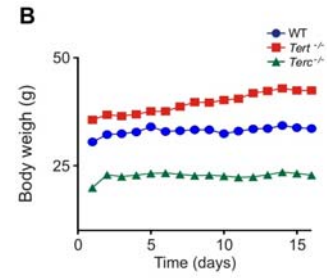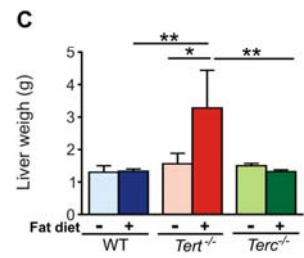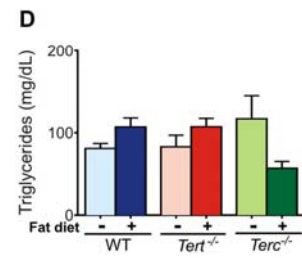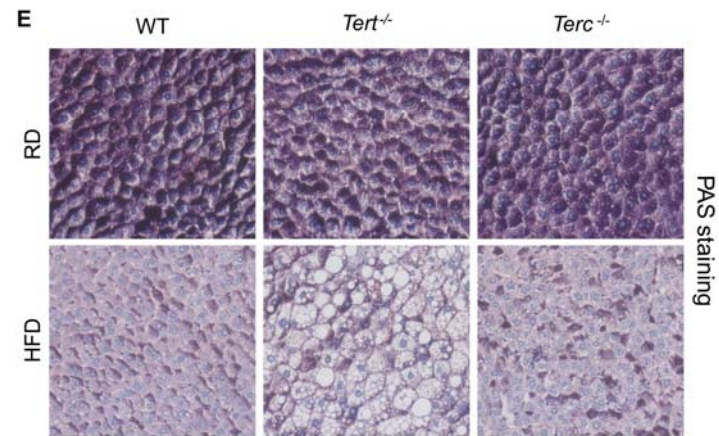

**Supplementary Fig. 1.** Effects of 15-day HFD in *Tert*<sup>-/-</sup>, *Terc*<sup>-/-</sup>, and WT male mice. (A) Food intake related as mL/mouse/day, (B) Body weights of mice fed with HFD, (C) Liver weights of mice with RD and HFD conditions, (D) Serum triglycerides level, and (E) representative light microscopy images of PAS staining in paraffined mouse livers. Apparent reduction of glycogen content was observed after fed HFD. Body weight gain and food intake were measured every day during the experimental period. After day 3, body weights of *Tert*<sup>-/-</sup> mice were significantly different from those of both *Terc*<sup>-/-</sup> and WT mice submitted to HFD, following all time points ( $P < 0.05$ ). Mean values were analyzed by Unpaired t-test with Welch's correction. Data represent 6 - 12 animals per group.

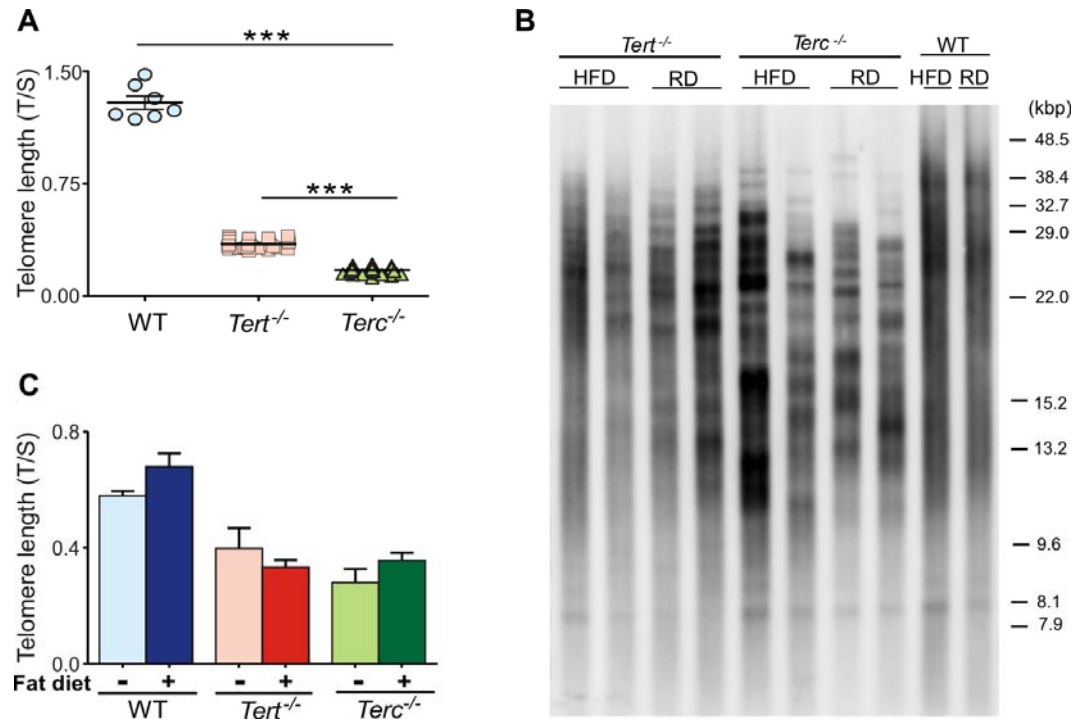

**Supplementary Fig. 2.** Telomere length analysis in peripheral blood and liver DNAs from WT, *Tert*<sup>-/-</sup> (G3), and *Terc*<sup>-/-</sup> (G3) with RD and HFD exposure. Telomere length was measured by (A) qPCR in peripheral blood DNAs (WT: 7 animal per group; *Tert*<sup>-/-</sup>: 34 animals per group; *Terc*<sup>-/-</sup>: 45 animals per group) (B) TRF analysis in liver DNAs, and (C) qPCR in liver DNAs. Mean values were analyzed by Unpaired t-test with Welch's correction ( $P < 0.05$ ). Data represent 6-12 animals per group.

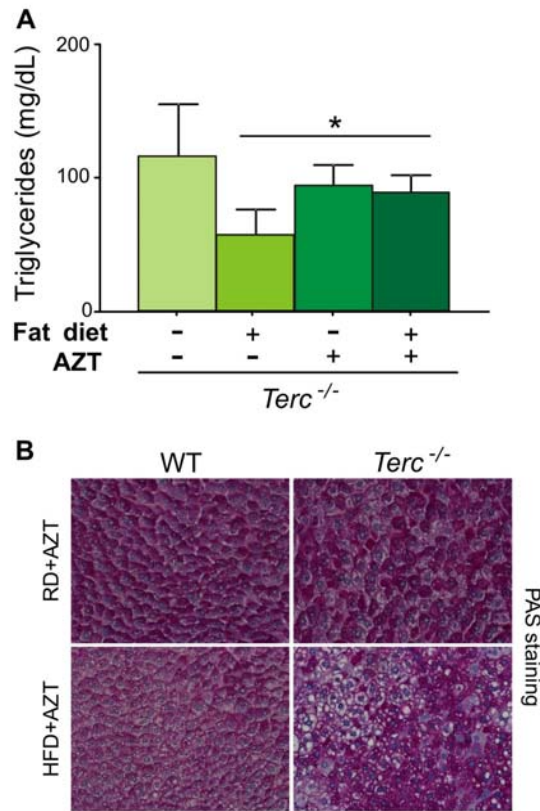

**Supplementary Fig. 3.** Effects of 15-day HFD in *Terc*<sup>-/-</sup>, and WT male mice treated with AZT. (A) Serum triglycerides level in *Terc*<sup>-/-</sup> mouse liver, and (B) representative light microscopy images of PAS staining in paraffined mouse livers, showing apparent increase of glycogen content after fed with HFD. Data represent 6 - 8 animals per group.

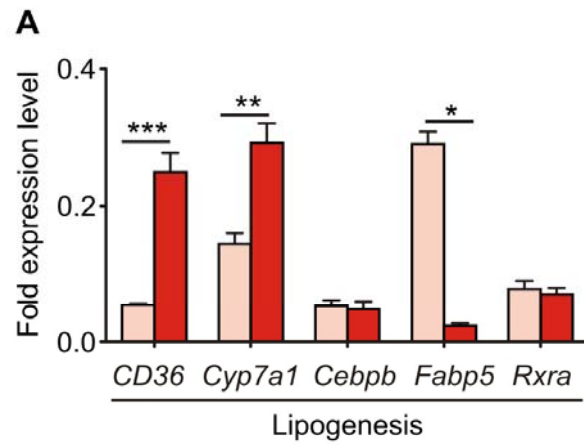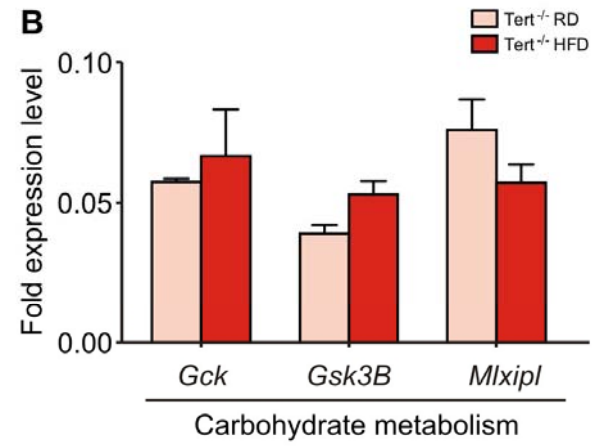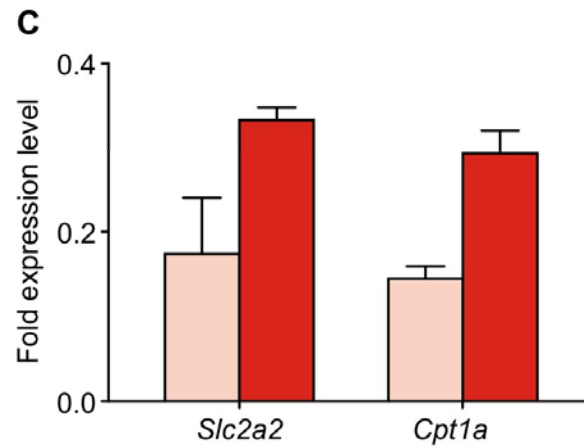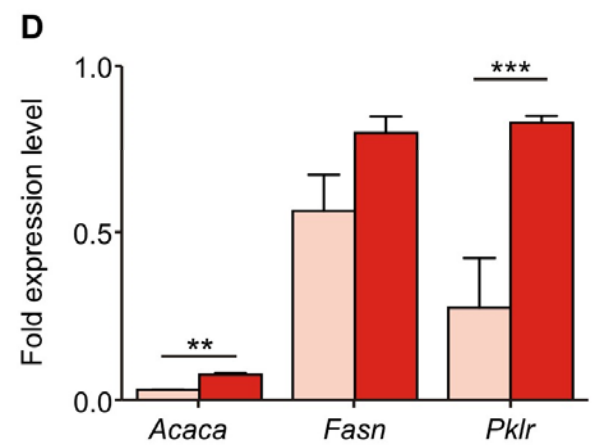

**Supplementary Fig. 4.** Gene expression of master regulators of mitochondrial physiology and metabolism and electron microscopy of WT and *Tert*<sup>-/-</sup> mouse livers. (A, B) Real-time qPCR validation of PPARGC-1 $\alpha$  and PPAR $\alpha$  in livers tissues.  $\Delta\Delta\text{Ct}$  method was used to analyse RT-qPCR data (n = 3 per group), t-test was used to calculate the statistical significance and error bars indicate s.e.m.; (C) Representative electron microscopy pictures used for mitochondrial integrity of WT and *Tert*<sup>-/-</sup> (G3) mouse livers (n = 3). Mitochondria showed healthy in both mouse livers under RD and HFD conditions.

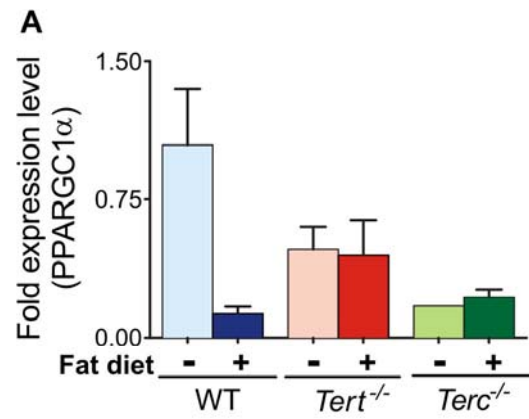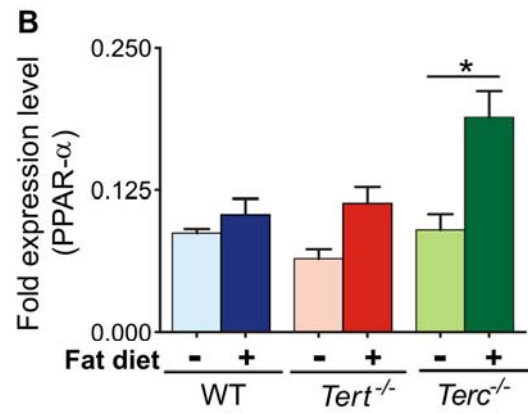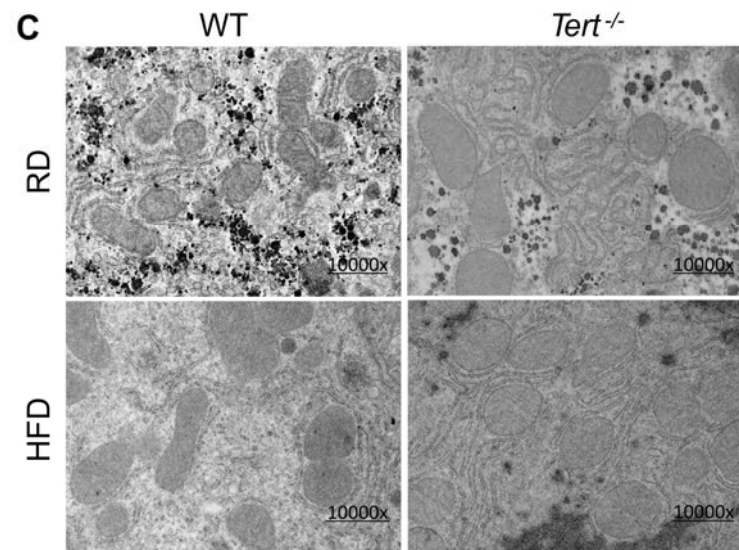



**Supplementary Fig. 5.** Gene expression analysis in *Tert*<sup>-/-</sup> (G1) mouse livers. Gene expression profiles in the liver of 6-months old male mice fed with RD and HFD for 15 days. (A - D) Fold expression levels of affected genes under HFD conditions in *Tert*<sup>-/-</sup> mouse livers. Error bars represent SD. Statistical significance was determined by test *t* Student \**P* < 0.05; \*\**P* < 0.001; \*\*\**P* < 0.0001.

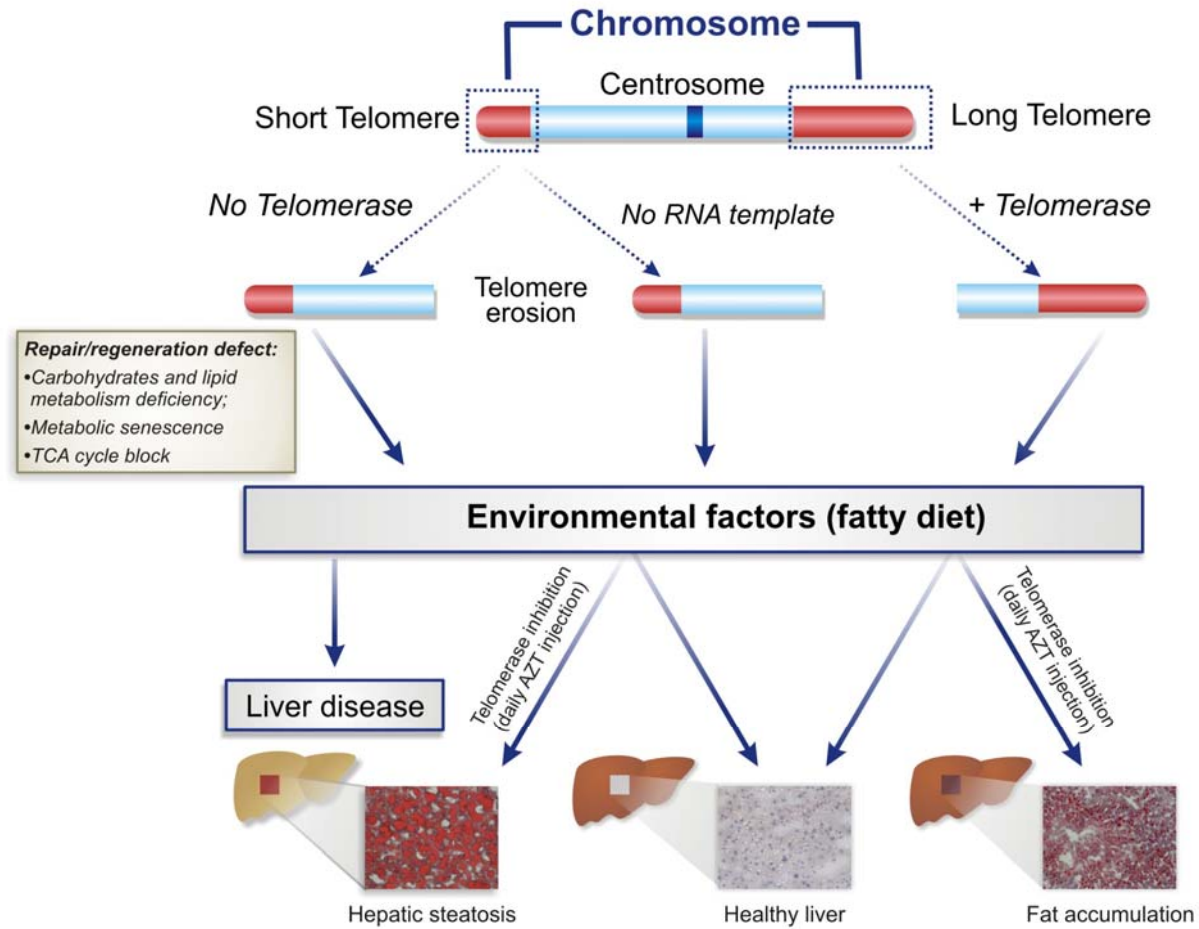

**Supplementary Fig. 6.** Schematic figure with abnormal profile in *Tert*<sup>-/-</sup> and *Terc*<sup>-/-</sup> mouse livers. □ Mice null for the telomerase reverse

transcriptase (*Tert*) or the telomerase RNA component (*Terc*) genes presented abnormal hepatocytes metabolic profiles and on a short-term HFD. Only *Tert*<sup>-/-</sup> animals develop hepatocyte injury with frank steatosis. *Tert*<sup>-/-</sup> livers but not *Terc*<sup>-/-</sup> livers were unable to activate and repress genes involved in metabolic pathways, causing an abnormal metabolomics profile and clinically resulting in overt liver steatosis and hepatocyte injury. Similar liver damage was recapitulated in *Terc*<sup>-/-</sup> animals fed with HFD when telomerase enzyme was chemically inhibited by zidovudine (AZT; 400 mg/kg/day).

## Tables

**Supplementary Table 1. General Nutritional Profile**

| <b>Macronutrients</b>      | <b>Regular Diet*</b> | <b>High Dat Diet**</b> |
|----------------------------|----------------------|------------------------|
| Protein (%)                | 8                    | 16.7                   |
| Fat (%)                    | 6                    | 17.7                   |
| Fiber (%)                  | 3.5                  | 4.3                    |
| Carbohydrate (%)           | 44.2                 | 54.3                   |
| Ash (%) ***                | 5.3                  | 3.3                    |
| Moisture (%)               | -                    | < 10                   |
| Neutral Detergent<br>Fiber | 14.7                 | -                      |

\*Harlan Laboratories: Teklad Global 18% Protein Extruded Rodent Diet (sterilizable), #2018SX.

\*\*BioServ: Lieber-DeCarli '82 Shake and Pour control liquid diet, #F1259SP.

\*\*\*Ash: Analytical chemistry.

Supplementary Table 2. Comparative analysis of mouse liver metabolites

| HMT DB<br>Compound name   | Concentration (nmol/g) |      |        |      |                               |       |                                |         |                               |       |                                |         |
|---------------------------|------------------------|------|--------|------|-------------------------------|-------|--------------------------------|---------|-------------------------------|-------|--------------------------------|---------|
|                           | WT RD                  |      | WT HFD |      | <i>Tert</i> <sup>-/-</sup> RD |       | <i>Tert</i> <sup>-/-</sup> HFD |         | <i>Terc</i> <sup>-/-</sup> RD |       | <i>Terc</i> <sup>-/-</sup> HFD |         |
|                           | Mean                   | S.D. | Mean   | S.D. | Mean                          | S.D.  | Mean                           | S.D.    | Mean                          | S.D.  | Mean                           | S.D.    |
| NAD <sup>+</sup>          | 256                    | 164  | 114    | 18   | 202                           | 34    | 266                            | 56      | 173                           | 85    | 67                             | 53      |
| cAMP                      | 0,4                    | 0,12 | 0,2    | 0,03 | 0,2                           | 0,014 | 0,3                            | 0,03    | 0,2                           | 0,06  | 0,3                            | 0,010   |
| cGMP                      | N.D.                   | N.A. | N.D.   | N.A. | 0,006                         | 0,002 | 0,006                          | 4,8E-04 | 0,007                         | 0,002 | 0,02                           | 0,008   |
| Xanthine                  | 288                    | 142  | 450    | 111  | 139                           | 39    | 143                            | 48      | 196                           | 75    | 342                            | 80      |
| NADH                      | 7,2                    | 2,1  | 4,7    | 0,3  | 2,8                           | 0,4   | 2,8                            | 0,2     | 2,8                           | 0,10  | 2,6                            | 0,4     |
| ADP-ribose                | 202                    | 76   | 184    | 60   | 147                           | 32    | 158                            | 11      | 210                           | 49    | 152                            | 41      |
| Mevalonic acid            | N.D.                   | N.A. | N.D.   | N.A. | N.D.                          | N.A.  | N.D.                           | N.A.    | N.D.                          | N.A.  | N.D.                           | N.A.    |
| UDP-glucose               | 107                    | 122  | 36     | 25   | 66                            | 27    | 65                             | 52      | 63                            | 25    | 18                             | 7,5     |
| Uric acid                 | 190                    | 31   | 139    | 74   | 15                            | 5,2   | 23                             | 12      | 53                            | 62    | 67                             | 32      |
| NADP <sup>+</sup>         | 26                     | 33   | 5,9    | 2,4  | 23                            | 10    | 22                             | 9,3     | 19                            | 14    | 3,8                            | 0,4     |
| IMP                       | 205                    | 73   | 170    | 22   | 104                           | 55    | 150                            | 83      | 133                           | 53    | 69                             | 19      |
| Sedoheptulose 7-phosphate | 174                    | 88   | 121    | 17   | 86                            | 34    | 64                             | 19      | 89                            | 14    | 35                             | 9,7     |
| Glucose 6-phosphate       | 284                    | 67   | 156    | 30   | 201                           | 86    | 117                            | 35      | 195                           | 35    | 124                            | 25      |
| Fructose 6-phosphate      | 68                     | 21   | 39     | 6,5  | 79                            | 30    | 53                             | 18      | 74                            | 21    | 56                             | 15      |
| Fructose 1-phosphate      | 41                     | 5,2  | 25     | 5,5  | 38                            | 7,7   | 26                             | 11      | 47                            | 21    | 34                             | 9,2     |
| Galactose 1-phosphate     | 48                     | 14   | 45     | 3,1  | 37                            | 15    | 22                             | 3,7     | 37                            | 12    | 37                             | 2,8     |
| Glucose 1-phosphate       | 21                     | 4,8  | 14     | 5,7  | 18                            | 8,3   | 10                             | 2,6     | 17                            | 6,2   | 9,6                            | 2,3     |
| Acetoacetyl CoA           | N.D.                   | N.A. | N.D.   | N.A. | 0,006                         | 0,002 | 0,004                          | N.A.    | 0,004                         | N.A.  | 0,004                          | 1,4E-03 |
| Acetyl CoA                | 4,6                    | 4,9  | 2,2    | 0,5  | 4,6                           | 3,7   | 5,7                            | 2,2     | 6,0                           | 5,0   | 2,1                            | 0,3     |

|                                  |        |       |        |       |        |       |        |       |        |       |        |       |
|----------------------------------|--------|-------|--------|-------|--------|-------|--------|-------|--------|-------|--------|-------|
| Folic acid                       | N.D.   | N.A.  | N.D.   | N.A.  | 0,02   | 0,005 | 0,02   | 0,002 | 0,03   | 0,007 | 0,05   | 0,03  |
| Ribose 5-phosphate               | 21     | 5,8   | 25     | 3,7   | 41     | 10    | 38     | 2,5   | 61     | 7,5   | 46     | 8,9   |
| CoA                              | 39     | 14    | 55     | 7,6   | 168    | 14    | 181    | 11    | 205    | 103   | 135    | 12    |
| Ribose 1-phosphate               | 256    | 49    | 247    | 13    | 209    | 22    | 223    | 25    | 272    | 75    | 121    | 30    |
| Ribulose 5-phosphate             | 3,5    | 2,0   | 2,7    | 1,9   | 3,0    | 1,1   | 2,3    | 1,1   | 2,7    | 3,0   | 12     | 6,2   |
| Xylulose 5-phosphate             | 7,2    | 5,2   | 6,8    | 4,5   | 6,7    | 4,5   | 3,8    | 1,1   | 6,3    | 3,4   | 19     | 7,0   |
| Erythrose 4-phosphate            | N.D.   | N.A.  | N.D.   | N.A.  | 0,5    | 0,4   | 0,5    | 0,4   | 0,6    | 0,2   | N.D.   | N.A.  |
| HMG CoA                          | 0,2    | 0,011 | 0,12   | 0,011 | 0,09   | 0,02  | 0,07   | 0,04  | 0,2    | 0,07  | 0,08   | 0,015 |
| Glyceraldehyde 3-phosphate       | 10     | 1,7   | 7,6    | 3,3   | 4,3    | 1,3   | 3,6    | 2,9   | 5,4    | 1,9   | 4,7    | 2,6   |
| NADPH                            | 3,7    | 0,7   | 2,1    | 0,2   | 1,8    | 0,4   | 1,7    | 0,02  | 1,7    | 0,04  | 1,6    | 0,2   |
| Malonyl CoA                      | N.D.   | N.A.  | 0,06   | N.A.  | 0,14   | N.A.  | 0,13   | N.A.  | 0,13   | 0,012 | 0,11   | N.A.  |
| Phosphocreatine                  | 6,9    | N.A.  | 0,2    | 0,2   | 0,9    | 0,6   | 0,5    | 0,04  | 0,5    | 0,4   | 0,9    | 0,8   |
| XMP                              | 0,4    | 0,2   | 0,9    | 0,2   | 0,2    | 0,13  | 0,3    | 0,06  | 0,4    | 0,3   | 0,5    | 0,3   |
| Dihydroxyacetone phosphate       | 100    | 5,1   | 93     | 26    | 125    | 14    | 98     | 40    | 160    | 62    | 189    | 66    |
| Adenylosuccinic acid             | 25     | 7,8   | 30     | 10    | 59     | 12    | 27     | 2,5   | 65     | 38    | 38     | 11    |
| Fructose 1,6-diphosphate         | 24     | 9,7   | 18     | 14    | 22     | 9,7   | 9,1    | 5,9   | 33     | 24    | 82     | 69    |
| 6-Phosphogluconic acid           | 32     | 0,9   | 26     | 6,0   | 50     | 22    | 22     | 3,3   | 44     | 19    | 32     | 11    |
| <i>N</i> -Carbamoylaspartic acid | 1,0    | 0,8   | 1,5    | 1,5   | 4,2    | 6,7   | 4,2    | 6,7   | 0,4    | 0,4   | 0,5    | 0,6   |
| PRPP                             | N.D.   | N.A.  | N.D.   | N.A.  | 1,4    | 0,3   | 1,4    | 0,5   | 1,9    | 1,1   | 1,0    | 0,2   |
| 2-Phosphoglyceric acid           | 13     | 6,8   | 12     | 2,4   | 1,4    | 0,13  | 1,0    | 0,5   | 2,7    | 2,3   | 1,6    | 1,3   |
| 2,3-Diphosphoglyceric acid       | 23     | 15    | 29     | 4,0   | 92     | 14    | 88     | 54    | 95     | 34    | 106    | 59    |
| 3-Phosphoglyceric acid           | 129    | 65    | 113    | 29    | 16     | 1,1   | 11     | 5,3   | 31     | 27    | 17     | 16    |
| Phosphoenolpyruvic acid          | 42     | 20    | 39     | 7,8   | 4,4    | 0,3   | 2,6    | 1,3   | 8,0    | 7,1   | 4,5    | 4,3   |
| GMP                              | 295    | 48    | 226    | 23    | 248    | 20    | 211    | 14    | 261    | 48    | 160    | 11    |
| AMP                              | 1.626  | 186   | 1.142  | 189   | 1.197  | 127   | 1.079  | 64    | 1.049  | 233   | 815    | 89    |
| 2-Oxoisovaleric acid             | N.D.   | N.A.  |
| GDP                              | 14     | 6,9   | 13     | 0,8   | 18     | 1,2   | 16     | 3,0   | 18     | 3,3   | 18     | 0,7   |
| Lactic acid                      | 21.211 | 6.066 | 20.413 | 2.633 | 15.893 | 2.226 | 18.784 | 2.580 | 19.400 | 2.099 | 23.094 | 579   |
| ADP                              | 238    | 144   | 114    | 43    | 254    | 45    | 217    | 22    | 258    | 71    | 113    | 21    |
| GTP                              | 11     | 1,7   | 6,8    | 0,4   | 4,7    | 1,3   | 3,6    | 0,7   | 5,1    | 1,1   | 3,8    | 0,6   |
| Glyoxylic acid                   | N.D.   | N.A.  | N.D.   | N.A.  | N.D.   | N.A.  | N.D.   | N.A.  | 5,6    | N.A.  | N.D.   | N.A.  |
| ATP                              | 35     | 19    | 16     | 1,8   | 53     | 25    | 35     | 8,7   | 68     | 32    | 17     | 5,4   |
| Glycerol 3-phosphate             | 1.464  | 599   | 1.202  | 220   | 1.383  | 462   | 786    | 123   | 1.417  | 649   | 587    | 130   |
| Glycolic acid                    | 30     | N.A.  | 27     | 8,1   | N.D.   | N.A.  | N.D.   | N.A.  | N.D.   | N.A.  | N.D.   | N.A.  |

|                               |       |      |       |       |       |       |       |       |       |       |       |       |
|-------------------------------|-------|------|-------|-------|-------|-------|-------|-------|-------|-------|-------|-------|
| Pyruvic acid                  | 82    | 37   | 48    | 15    | 179   | 69    | 232   | 61    | 261   | 41    | 91    | 21    |
| <i>N</i> -Acetylglutamic acid | 46    | 11   | 57    | 16    | 60    | 29    | 56    | 28    | 58    | 8,0   | 45    | 44    |
| 2-Hydroxyglutaric acid        | 29    | 6,5  | 24    | 3,2   | 11    | 2,2   | 18    | 1,6   | 16    | 9,3   | 20    | 13    |
| Carbamoylphosphate            | N.D.  | N.A. | N.D.  | N.A.  | 1,5   | N.A.  | 0,4   | N.A.  | N.D.  | N.A.  | N.D.  | N.A.  |
| Succinic acid                 | 1.201 | 412  | 1.258 | 181   | 783   | 380   | 884   | 255   | 850   | 460   | 768   | 244   |
| Malic acid                    | 555   | 87   | 460   | 111   | 321   | 104   | 78    | 47    | 417   | 135   | 422   | 190   |
| 2-Oxoglutaric acid            | N.D.  | N.A. | N.D.  | N.A.  | N.D.  | N.A.  | N.D.  | N.A.  | N.D.  | N.A.  | N.D.  | N.A.  |
| Fumaric acid                  | 127   | 18   | 114   | 32    | 113   | 38    | 30    | 5,6   | 147   | 39    | 130   | 56    |
| Citric acid                   | 39    | 17   | 21    | 13    | 49    | 13    | 44    | 4,1   | 34    | 29    | 28    | 13    |
| <i>cis</i> -Aconitic acid     | 1,8   | 0,2  | 0,7   | 0,4   | N.D.  | N.A.  | N.D.  | N.A.  | N.D.  | N.A.  | N.D.  | N.A.  |
| Isocitric acid                | N.D.  | N.A. | N.D.  | N.A.  | N.D.  | N.A.  | N.D.  | N.A.  | N.D.  | N.A.  | N.D.  | N.A.  |
| Urea                          | 7.508 | 825  | 5.176 | 691   | 6.702 | 1.676 | 3.927 | 959   | 7.087 | 2.541 | 5.900 | 588   |
| Gly                           | 2.647 | 184  | 2.262 | 474   | 2.307 | 415   | 1.913 | 23    | 2.822 | 306   | 2.235 | 180   |
| Putrescine                    | 6,4   | 2,3  | 17    | 10    | 8,9   | 1,6   | 15    | 4,9   | 4,9   | 1,2   | 28    | 18    |
| Sarcosine                     | 122   | 4,0  | 127   | 29    | 85    | 44    | 59    | 15    | 121   | 33    | 93    | 34    |
| $\beta$ -Ala                  | 192   | 37   | 234   | 14    | 228   | 8,3   | 228   | 193   | 262   | 97    | 428   | 34    |
| Ala                           | 5.544 | 758  | 5.419 | 1.073 | 4.046 | 1.007 | 5.580 | 1.501 | 4.668 | 1.352 | 4.917 | 1.213 |
| $\gamma$ -Aminobutyric acid   | 43    | 1,3  | 46    | 7,9   | 23    | 8,8   | 7,3   | 2,1   | 33    | 4,4   | 34    | 9,6   |
| <i>N,N</i> -Dimethylglycine   | 75    | 2,9  | 43    | 16    | 60    | 38    | 36    | 16    | 51    | 23    | 70    | 27    |
| Choline                       | 195   | 35   | 285   | 124   | 228   | 248   | 228   | 60    | 378   | 137   | 309   | 60    |
| Ser                           | 351   | 80   | 210   | 24    | 373   | 61    | 218   | 36    | 402   | 96    | 337   | 129   |
| Creatinine                    | 3,7   | 1,2  | 4,0   | 1,8   | 5,5   | 2,3   | 3,7   | 2,8   | 5,4   | 2,5   | 5,2   | 2,0   |
| Pro                           | 265   | 42   | 414   | 69    | 324   | 63    | 346   | 169   | 452   | 48    | 586   | 96    |
| Betaine                       | 671   | 59   | 167   | 95    | 1.742 | 889   | 456   | 150   | 834   | 218   | 962   | 639   |
| Val                           | 607   | 10   | 490   | 39    | 474   | 165   | 449   | 64    | 650   | 31    | 578   | 57    |
| Thr                           | 415   | 18   | 325   | 69    | 353   | 70    | 314   | 43    | 483   | 50    | 451   | 41    |
| Homoserine                    | 1,9   | 0,5  | 0,9   | 0,8   | 2,1   | 0,6   | 1,4   | 0,3   | 1,5   | 0,3   | 2,1   | 1,0   |
| Betaine aldehyde              | 3,0   | 1,0  | 3,5   | 2,4   | 4,5   | 6,4   | 3,6   | 1,8   | 7,8   | 5,8   | 4,0   | 1,7   |
| Cys                           | 11    | 6,8  | 16    | 16    | 7,2   | 3,9   | 13    | 9,9   | 21    | 21    | 12    | 12    |
| Hydroxyproline                | 39    | 14   | 53    | 11    | 46    | 1,4   | 21    | 13    | 34    | 11    | 23    | 3,9   |
| Creatine                      | 303   | 60   | 324   | 102   | 395   | 154   | 221   | 76    | 364   | 137   | 503   | 185   |
| Ile                           | 332   | 20   | 262   | 24    | 257   | 95    | 211   | 43    | 345   | 39    | 314   | 68    |
| Leu                           | 601   | 2,5  | 544   | 90    | 540   | 153   | 433   | 58    | 667   | 71    | 677   | 143   |
| Asn                           | 197   | 5,6  | 181   | 18    | 192   | 38    | 149   | 27    | 255   | 44    | 250   | 68    |

|                         |       |       |       |       |       |       |       |       |       |       |       |         |
|-------------------------|-------|-------|-------|-------|-------|-------|-------|-------|-------|-------|-------|---------|
| Ornithine               | 297   | 25    | 320   | 58    | 322   | 117   | 188   | 21    | 343   | 48    | 409   | 71      |
| Asp                     | 312   | 89    | 282   | 54    | 407   | 69    | 220   | 68    | 362   | 65    | 419   | 123     |
| Homocysteine            | N.D.  | N.A.    |
| Adenine                 | 5,2   | 1,5   | 6,1   | 1,8   | 6,7   | 0,8   | 6,4   | 1,6   | 6,9   | 1,8   | 4,6   | 0,6     |
| Hypoxanthine            | 203   | 79    | 311   | 51    | 198   | 74    | 120   | 33    | 223   | 83    | 459   | 84      |
| Spermidine              | 135   | 53    | 125   | 18    | 60    | 7,6   | 75    | 14    | 49    | 7,1   | 70    | 19      |
| Gln                     | 3.022 | 666   | 3.278 | 511   | 2.578 | 1.569 | 2.830 | 733   | 2.712 | 1.136 | 2.860 | 654     |
| Lys                     | 623   | 67    | 797   | 12    | 790   | 161   | 805   | 333   | 949   | 155   | 1.290 | 81      |
| Glu                     | 1.453 | 514   | 1.669 | 383   | 1.093 | 455   | 824   | 308   | 1.350 | 347   | 1.007 | 90      |
| Met                     | 100   | 3,7   | 114   | 19    | 98    | 7,8   | 71    | 18    | 133   | 31    | 144   | 38      |
| Guanine                 | N.D.  | N.A.    |
| His                     | 528   | 99    | 491   | 34    | 565   | 80    | 568   | 8,0   | 546   | 32    | 608   | 146     |
| Carnitine               | 210   | 57    | 198   | 38    | 316   | 153   | 201   | 23    | 257   | 13    | 185   | 42      |
| Phe                     | 215   | 6,0   | 213   | 38    | 232   | 43    | 187   | 31    | 273   | 57    | 290   | 58      |
| Arg                     | 9,6   | 3,5   | 4,9   | 1,3   | 2,4   | 1,4   | 1,8   | 0,7   | 2,5   | 0,5   | 2,1   | 0,7     |
| Citrulline              | 49    | 7,3   | 22    | 4,3   | 24    | 5,0   | 18    | 4,7   | 25    | 13    | 22    | 10      |
| Tyr                     | 214   | 23    | 262   | 40    | 189   | 35    | 169   | 13    | 281   | 93    | 327   | 131     |
| Spermine                | 30    | 23    | 20    | 2,7   | 27    | 9,7   | 25    | 8,0   | 29    | 4,4   | 23    | 4,1     |
| Trp                     | 69    | 3,7   | 62    | 6,4   | 53    | 12    | 49    | 5,8   | 69    | 26    | 90    | 17      |
| Cystathionine           | 21    | 3,7   | 22    | 6,9   | 19    | 9,0   | 25    | 9,3   | 27    | 2,0   | 68    | 29      |
| Carnosine               | 3,9   | 0,5   | 3,0   | 0,4   | 2,3   | 0,6   | 1,7   | 0,06  | 2,2   | 0,13  | 2,0   | 0,2     |
| Adenosine               | 43    | 18    | 24    | 4,9   | 46    | 4,2   | 29    | 9,4   | 34    | 15    | 25    | 5,8     |
| Inosine                 | 668   | 316   | 873   | 108   | 744   | 223   | 547   | 194   | 919   | 108   | 806   | 179     |
| Guanosine               | 14    | 3,3   | 8,0   | 0,7   | 19    | 5,6   | 9,4   | 3,3   | 17    | 6,3   | 12    | 3,1     |
| Argininosuccinic acid   | 13    | 5,9   | 5,3   | 1,0   | 6,3   | 1,1   | 2,8   | 0,2   | 5,4   | 2,1   | 3,0   | 0,4     |
| Glutathione (GSSG)      | 984   | 358   | 1.038 | 78    | 1.534 | 93    | 1.033 | 113   | 1.434 | 295   | 976   | 238     |
| Glutathione (GSH)       | 5.354 | 515   | 5.264 | 381   | 4.279 | 440   | 3.665 | 671   | 3.762 | 254   | 3.284 | 357     |
| S-Adenosylhomocysteine  | 69    | 3,3   | 80    | 16    | 54    | 18    | 31    | 4,0   | 69    | 15    | 46    | 5,3     |
| S-Adenosylmethionine    | 55    | 16    | 26    | 7,1   | 61    | 19    | 55    | 33    | 46    | 12    | 36    | 19      |
| Adenylate Energy Charge | 0,08  | 0,03  | 0,06  | 0,009 | 0,12  | 0,03  | 0,11  | 0,013 | 0,14  | 0,02  | 0,08  | 0,012   |
| Total Adenylate         | 1.900 | 349   | 1.273 | 229   | 1.504 | 134   | 1.331 | 76    | 1.375 | 317   | 945   | 107     |
| Guanylate Energy Charge | 0,05  | 0,006 | 0,05  | 0,006 | 0,05  | 0,006 | 0,05  | 0,011 | 0,05  | 0,004 | 0,07  | 9,3E-04 |
| Total Guanylate         | 320   | 56    | 246   | 23    | 271   | 20    | 231   | 12    | 284   | 52    | 182   | 12      |
| GSH/GSSG                | 5,8   | 1,6   | 5,1   | 0,7   | 2,8   | 0,4   | 3,6   | 1,0   | 2,7   | 0,6   | 3,5   | 0,9     |

|                                        |        |       |        |       |        |         |        |         |        |       |        |       |
|----------------------------------------|--------|-------|--------|-------|--------|---------|--------|---------|--------|-------|--------|-------|
| Total Glutathione                      | 7.323  | 1.050 | 7.340  | 245   | 7.347  | 373     | 5.731  | 510     | 6.630  | 415   | 5.236  | 534   |
| NADPH/NADP+                            | 0,3    | 0,3   | 0,4    | 0,15  | 0,08   | 0,02    | 0,08   | 0,03    | 0,07   | 0,03  | 0,4    | 0,04  |
| NADH/NAD+                              | 0,03   | 0,011 | 0,04   | 0,004 | 0,014  | 1,3E-03 | 0,011  | 1,5E-03 | 0,02   | 0,009 | 0,05   | 0,02  |
| Lactate/Pyruvate                       | 276    | 59    | 465    | 190   | 98     | 37      | 84     | 16      | 77     | 22    | 264    | 56    |
| Glycerol 3-phosphate/DHAP              | 15     | 5,9   | 14     | 5,4   | 11     | 3,1     | 9,1    | 4,0     | 9,2    | 2,9   | 3,6    | 2,3   |
| Total Amino Acids                      | 17.512 | 1.084 | 17.298 | 2.581 | 14.880 | 3.459   | 15.351 | 1.228   | 17.443 | 2.209 | 17.395 | 2.708 |
| Total Essential Amino Acids            | 3.489  | 191   | 3.298  | 251   | 3.362  | 727     | 3.088  | 295     | 4.116  | 180   | 4.443  | 472   |
| Total Non-essential Amino Acids        | 14.022 | 968   | 14.000 | 2.363 | 11.518 | 2.878   | 12.263 | 1.120   | 13.327 | 2.389 | 12.952 | 2.290 |
| Total Glucogenic Amino Acids           | 16.288 | 1.046 | 15.956 | 2.520 | 13.549 | 3.190   | 14.113 | 980     | 15.827 | 2.202 | 15.428 | 2.634 |
| Total Ketogenic Amino Acids            | 2.469  | 76    | 2.464  | 224   | 2.413  | 524     | 2.168  | 264     | 3.068  | 182   | 3.440  | 373   |
| Total BCAA                             | 1.541  | 21    | 1.296  | 142   | 1.271  | 412     | 1.093  | 164     | 1.662  | 138   | 1.570  | 255   |
| Total Aromatic Amino Acids             | 498    | 26    | 537    | 84    | 474    | 88      | 405    | 41      | 624    | 171   | 708    | 205   |
| Fischer's Ratio                        | 3,1    | 0,2   | 2,4    | 0,2   | 2,7    | 0,7     | 2,7    | 0,13    | 2,8    | 0,7   | 2,3    | 0,4   |
| Total Glu-related Amino Acids          | 5.278  | 1.153 | 5.857  | 886   | 4.562  | 2.128   | 4.570  | 360     | 5.062  | 1.398 | 5.063  | 949   |
| Total Pyr-related Amino Acids          | 9.033  | 846   | 8.295  | 1.627 | 7.138  | 1.076   | 8.087  | 1.409   | 8.465  | 1.235 | 8.041  | 1.219 |
| Total Acetyl CoA-related Amino Acids   | 1.625  | 84    | 1.665  | 105   | 1.640  | 407     | 1.498  | 288     | 2.030  | 98    | 2.371  | 186   |
| Total Fumarate-related Amino Acids     | 429    | 23    | 475    | 77    | 421    | 77      | 356    | 36      | 555    | 146   | 618    | 188   |
| Total Succinyl CoA-related Amino Acids | 1.039  | 19    | 866    | 60    | 829    | 261     | 731    | 101     | 1.128  | 85    | 1.036  | 151   |
| Total Oxaloacetate-related Amino Acids | 509    | 94    | 463    | 38    | 599    | 92      | 369    | 43      | 617    | 26    | 670    | 189   |
| Malate/Asp                             | 1,9    | 0,5   | 1,6    | 0,4   | 0,8    | 0,4     | 0,4    | 0,3     | 1,2    | 0,4   | 1,0    | 0,3   |
| Citrulline/Ornithine                   | 0,2    | 0,02  | 0,07   | 0,02  | 0,09   | 0,05    | 0,10   | 0,04    | 0,08   | 0,05  | 0,06   | 0,04  |
| Glu/2-Oxoglutarate                     | N.D.   | N.A.  | N.D.   | N.A.  | N.D.   | N.A.    | N.D.   | N.A.    | N.D.   | N.A.  | N.D.   | N.A.  |
| G6P/R5P                                | 15     | 8,9   | 6,6    | 2,4   | 4,8    | 1,1     | 3,1    | 1,0     | 3,2    | 0,6   | 2,8    | 0,9   |
| SAM/SAH                                | 0,8    | 0,2   | 0,3    | 0,13  | 1,3    | 0,6     | 1,9    | 1,2     | 0,7    | 0,3   | 0,8    | 0,4   |
| Putrescine/Spermidine                  | 0,05   | 0,03  | 0,14   | 0,08  | 0,15   | 0,02    | 0,2    | 0,11    | 0,10   | 0,012 | 0,5    | 0,3   |

N.D. (Not Detected): The target peak or metabolite was below detection limits.

N.A. (Not Available): The calculation was impossible because of insufficiency of the data.



Supplementary Table 3. Comparative analysis of mouse liver metabolites

| HMT DB<br>Compound name   | Comparative analysis |                    |                                                                 |                    |                                                                 |                    |
|---------------------------|----------------------|--------------------|-----------------------------------------------------------------|--------------------|-----------------------------------------------------------------|--------------------|
|                           | WT RD vs WT HFD      |                    | <i>Tert</i> <sup>-/-</sup> RD vs <i>Tert</i> <sup>-/-</sup> HFD |                    | <i>Terc</i> <sup>-/-</sup> RD vs <i>Terc</i> <sup>-/-</sup> HFD |                    |
|                           | Ratio ¶              | <i>p</i> -value ¶¶ | Ratio ¶                                                         | <i>p</i> -value ¶¶ | Ratio ¶                                                         | <i>p</i> -value ¶¶ |
| NAD <sup>+</sup>          | 0,4                  | 0,273              | 1,3                                                             | 0,181              | 0,4                                                             | 0,155              |
| cAMP                      | 0,5                  | 0,119              | 1,3                                                             | 0,057              | 1,1                                                             | 0,632              |
| cGMP                      | N.A.                 | N.A.               | 0,9                                                             | 0,798              | 2,2                                                             | 0,192              |
| Xanthine                  | 1,6                  | 0,198              | 1,0                                                             | 0,914              | 1,7                                                             | 0,084              |
| NADH                      | 0,7                  | 0,181              | 1,0                                                             | 0,914              | 0,9                                                             | 0,613              |
| ADP-ribose                | 0,9                  | 0,757              | 1,1                                                             | 0,623              | 0,7                                                             | 0,194              |
| Mevalonic acid            | N.A.                 | N.A.               | N.A.                                                            | N.A.               | N.A.                                                            | N.A.               |
| UDP-glucose               | 0,3                  | 0,420              | 1,0                                                             | 0,984              | 0,3                                                             | 0,075              |
| Uric acid                 | 0,7                  | 0,365              | 1,6                                                             | 0,355              | 1,3                                                             | 0,740              |
| NADP <sup>+</sup>         | 0,2                  | 0,399              | 1,0                                                             | 0,906              | 0,2                                                             | 0,198              |
| IMP                       | 0,8                  | 0,491              | 1,4                                                             | 0,474              | 0,5                                                             | 0,164              |
| Sedoheptulose 7-phosphate | 0,7                  | 0,407              | 0,7                                                             | 0,388              | 0,4                                                             | 0,008**            |
| Glucose 6-phosphate       | 0,5                  | 0,063              | 0,6                                                             | 0,231              | 0,6                                                             | 0,054              |
| Fructose 6-phosphate      | 0,6                  | 0,124              | 0,7                                                             | 0,283              | 0,8                                                             | 0,311              |
| Fructose 1-phosphate      | 0,6                  | 0,023 *            | 0,7                                                             | 0,193              | 0,7                                                             | 0,410              |
| Galactose 1-phosphate     | 0,9                  | 0,699              | 0,6                                                             | 0,201              | 1,0                                                             | 0,997              |
| Glucose 1-phosphate       | 0,7                  | 0,189              | 0,6                                                             | 0,253              | 0,6                                                             | 0,176              |
| Acetoacetyl CoA           | N.A.                 | N.A.               | 0,6                                                             | N.A.               | 1,1                                                             | N.A.               |
| Acetyl CoA                | 0,5                  | 0,485              | 1,2                                                             | 0,687              | 0,4                                                             | 0,315              |

|                                  |      |        |      |        |      |         |
|----------------------------------|------|--------|------|--------|------|---------|
| Folic acid                       | N.A. | N.A.   | 0,9  | 0,430  | 1,8  | 0,520   |
| Ribose 5-phosphate               | 1,2  | 0,398  | 0,9  | 0,664  | 0,8  | 0,089   |
| CoA                              | 1,4  | 0,182  | 1,1  | 0,294  | 0,7  | 0,359   |
| Ribose 1-phosphate               | 1,0  | 0,784  | 1,1  | 0,510  | 0,4  | 0,058   |
| Ribulose 5-phosphate             | 0,8  | 0,718  | 0,8  | 0,521  | 4,3  | 0,127   |
| Xylulose 5-phosphate             | 0,9  | 0,930  | 0,6  | 0,384  | 3,0  | 0,068   |
| Erythrose 4-phosphate            | N.A. | N.A.   | 1,0  | 0,989  | <1   | N.A.    |
| HMG CoA                          | 0,8  | 0,015* | 0,8  | 0,464  | 0,4  | 0,142   |
| Glyceraldehyde 3-phosphate       | 0,8  | 0,323  | 0,8  | 0,751  | 0,9  | 0,720   |
| NADPH                            | 0,6  | 0,041* | 0,9  | 0,603  | 0,9  | 0,404   |
| Malonyl CoA                      | 1<   | N.A.   | 1,0  | N.A.   | 0,9  | N.A.    |
| Phosphocreatine                  | 0,03 | N.A.   | 0,5  | 0,280  | 1,8  | 0,496   |
| XMP                              | 2,4  | 0,030* | 1,2  | 0,627  | 1,4  | 0,581   |
| Dihydroxyacetone phosphate       | 0,9  | 0,702  | 0,8  | 0,359  | 1,2  | 0,604   |
| Adenylosuccinic acid             | 1,2  | 0,532  | 0,5  | 0,042* | 0,6  | 0,350   |
| Fructose 1,6-diphosphate         | 0,8  | 0,581  | 0,4  | 0,130  | 2,5  | 0,339   |
| 6-Phosphogluconic acid           | 0,8  | 0,197  | 0,4  | 0,154  | 0,7  | 0,424   |
| <i>N</i> -Carbamoylaspartic acid | 1,5  | 0,635  | 1,0  | 0,999  | 1,1  | 0,905   |
| PRPP                             | N.A. | N.A.   | 1,0  | 0,899  | 0,5  | 0,295   |
| 2-Phosphoglyceric acid           | 0,9  | 0,740  | 0,7  | 0,214  | 0,6  | 0,496   |
| 2,3-Diphosphoglyceric acid       | 1,3  | 0,557  | 1,0  | 0,906  | 1,1  | 0,785   |
| 3-Phosphoglyceric acid           | 0,9  | 0,726  | 0,7  | 0,245  | 0,6  | 0,517   |
| Phosphoenolpyruvic acid          | 0,9  | 0,824  | 0,6  | 0,143  | 0,6  | 0,511   |
| GMP                              | 0,8  | 0,113  | 0,9  | 0,068  | 0,6  | 0,061   |
| AMP                              | 0,7  | 0,034* | 0,9  | 0,245  | 0,8  | 0,218   |
| 2-Oxoisovaleric acid             | N.A. | N.A.   | N.A. | N.A.   | N.A. | N.A.    |
| GDP                              | 0,9  | 0,800  | 0,9  | 0,362  | 1,0  | 0,872   |
| Lactic acid                      | 1,0  | 0,849  | 1,2  | 0,217  | 1,2  | 0,084   |
| ADP                              | 0,5  | 0,270  | 0,9  | 0,294  | 0,4  | 0,062   |
| GTP                              | 0,6  | 0,051  | 0,8  | 0,279  | 0,8  | 0,179   |
| Glyoxylic acid                   | N.A. | N.A.   | N.A. | N.A.   | <1   | N.A.    |
| ATP                              | 0,5  | 0,231  | 0,7  | 0,346  | 0,2  | 0,104   |
| Glycerol 3-phosphate             | 0,8  | 0,537  | 0,6  | 0,147  | 0,4  | 0,153   |
| Glycolic acid                    | 0,9  | N.A.   | N.A. | N.A.   | N.A. | N.A.    |
| Pyruvic acid                     | 0,6  | 0,254  | 1,3  | 0,377  | 0,3  | 0,008** |
| <i>N</i> -Acetylglutamic acid    | 1,2  | 0,410  | 0,9  | 0,868  | 0,8  | 0,663   |



|                         |      |         |      |         |      |        |
|-------------------------|------|---------|------|---------|------|--------|
| Adenine                 | 1,2  | 0,522   | 0,9  | 0,765   | 0,7  | 0,142  |
| Hypoxanthine            | 1,5  | 0,130   | 0,6  | 0,201   | 2,1  | 0.026* |
| Spermidine              | 0,9  | 0,767   | 1,2  | 0,215   | 1,4  | 0,191  |
| Gln                     | 1,1  | 0,627   | 1,1  | 0,818   | 1,1  | 0,857  |
| Lys                     | 1,3  | 0.042*  | 1,0  | 0,950   | 1,4  | 0.043* |
| Glu                     | 1,1  | 0,593   | 0,8  | 0,451   | 0,7  | 0,224  |
| Met                     | 1,1  | 0,319   | 0,7  | 0,112   | 1,1  | 0,726  |
| Guanine                 | N.A. | N.A.    | N.A. | N.A.    | N.A. | N.A.   |
| His                     | 0,9  | 0,594   | 1,0  | 0,950   | 1,1  | 0,538  |
| Carnitine               | 0,9  | 0,769   | 0,6  | 0,322   | 0,7  | 0,090  |
| Phe                     | 1,0  | 0,923   | 0,8  | 0,221   | 1,1  | 0,733  |
| Arg                     | 0,5  | 0,134   | 0,8  | 0,567   | 0,9  | 0,489  |
| Citrulline              | 0,4  |         | 0,8  | 0,229   | 0,9  | 0,794  |
|                         |      | 0.009** |      |         |      |        |
| Tyr                     | 1,2  | 0,164   | 0,9  | 0,428   | 1,2  | 0,646  |
| Spermine                | 0,7  | 0,531   | 0,9  | 0,813   | 0,8  | 0,174  |
| Trp                     | 0,9  | 0,215   | 0,9  | 0,634   | 1,3  | 0,331  |
| Cystathionine           | 1,0  | 0,850   | 1,3  | 0,492   | 2,5  | 0,132  |
| Carnosine               | 0,8  | 0,102   | 0,7  | 0,238   | 0,9  | 0,181  |
| Adenosine               | 0,6  | 0,210   | 0,6  | 0,070   | 0,7  | 0,401  |
| Inosine                 | 1,3  | 0,380   | 0,7  | 0,312   | 0,9  | 0,416  |
| Guanosine               | 0,6  | 0,096   | 0,5  | 0,085   | 0,7  | 0,262  |
| Argininosuccinic acid   | 0,4  | 0,159   | 0,4  | 0.027*  | 0,6  | 0,191  |
| Glutathione (GSSG)      | 1,1  | 0,823   | 0,7  | 0.005** | 0,7  | 0,108  |
| Glutathione (GSH)       | 1,0  | 0,820   | 0,9  | 0,266   | 0,9  | 0,139  |
| S-Adenosylhomocysteine  | 1,2  | 0,350   | 0,6  | 0,141   | 0,7  | 0,110  |
| S-Adenosylmethionine    | 0,5  | 0,075   | 0,9  | 0,778   | 0,8  | 0,491  |
| Adenylate Energy Charge | 0,7  | 0,364   | 0,9  | 0,585   | 0,5  | 0.026* |
| Total Adenylate         | 0,7  | 0,069   | 0,9  | 0,142   | 0,7  | 0,132  |
| Guanylate Energy Charge | 1,0  | 0,936   | 1,0  | 0,965   | 1,4  | 0.011* |
| Total Guanylate         | 0,8  | 0,136   | 0,9  | 0,056   | 0,6  | 0,069  |
| GSH/GSSG                | 0,9  | 0,539   | 1,3  | 0,304   | 1,3  | 0,280  |
| Total Glutathione       | 1,0  | 0,981   | 0,8  | 0.014*  | 0,8  | 0.026* |
| NADPH/NADP+             | 1,1  | 0,820   | 1,0  | 0,987   | 5,4  | 0.018* |
| NADH/NAD+               | 1,3  | 0,277   | 0,8  | 0.044*  | 2,7  | 0,130  |
| Lactate/Pyruvate        | 1,7  | 0,221   | 0,9  | 0,582   | 3,4  | 0.018* |

|                                        |      |         |      |        |      |       |
|----------------------------------------|------|---------|------|--------|------|-------|
| Glycerol 3-phosphate/DHAP              | 0,9  | 0,867   | 0,8  | 0,543  | 0,4  | 0,063 |
| Total Amino Acids                      | 1,0  | 0,904   | 1,0  | 0,841  | 1,0  | 0,982 |
| Total Essential Amino Acids            | 0,9  | 0,356   | 0,9  | 0,593  | 1,1  | 0,356 |
| Total Non-essential Amino Acids        | 1,0  | 0,989   | 1,1  | 0,708  | 1,0  | 0,854 |
| Total Glucogenic Amino Acids           | 1,0  | 0,848   | 1,0  | 0,793  | 1,0  | 0,851 |
| Total Ketogenic Amino Acids            | 1,0  | 0,978   | 0,9  | 0,522  | 1,1  | 0,221 |
| Total BCAA                             | 0,8  | 0,093   | 0,9  | 0,544  | 0,9  | 0,618 |
| Total Aromatic Amino Acids             | 1,1  | 0,512   | 0,9  | 0,309  | 1,1  | 0,616 |
| Fischer's Ratio                        | 0,8  | 0.012*  | 1,0  | 0,953  | 0,8  | 0,360 |
| Total Glu-related Amino Acids          | 1,1  | 0,530   | 1,0  | 0,995  | 1,0  | 0,999 |
| Total Pyr-related Amino Acids          | 0,9  | 0,536   | 1,1  | 0,410  | 0,9  | 0,694 |
| Total Acetyl CoA-related Amino Acids   | 1,0  | 0,631   | 0,9  | 0,651  | 1,2  | 0,066 |
| Total Fumarate-related Amino Acids     | 1,1  | 0,420   | 0,8  | 0,283  | 1,1  | 0,670 |
| Total Succinyl CoA-related Amino Acids | 0,8  | 0.029*  | 0,9  | 0,595  | 0,9  | 0,421 |
| Total Oxaloacetate-related Amino Acids | 0,9  | 0,497   | 0,6  | 0.033* | 1,1  | 0,676 |
| Malate/Asp                             | 0,9  | 0,592   | 0,5  | 0,193  | 0,8  | 0,551 |
| Citrulline/Ornithine                   | 0,4  |         | 1,2  | 0,726  | 0,8  | 0,662 |
|                                        |      | 0.007** |      |        |      |       |
| Glu/2-Oxoglutarate                     | N.A. | N.A.    | N.A. | N.A.   | N.A. | N.A.  |
| G6P/R5P                                | 0,4  | 0,225   | 0,7  | 0,135  | 0,9  | 0,576 |
| SAM/SAH                                | 0,4  | 0.048*  | 1,5  | 0,497  | 1,1  | 0,760 |
| Putrescine/Spermidine                  | 2,5  | 0,207   | 1,4  | 0,463  | 4,7  | 0,201 |

N.A. (Not Available): The calculation was impossible because of insufficiency of the data.

¶ The ratio is of computed by using averaged detection values. The latter was used as denominator.

|| The p-value is computed by Welch's t-test. (\* < 0.05, \*\* < 0.01, \*\*\* < 0.001)

**Supplementary Table 4. Eletronic microscopy analysis of WT and *Tert*<sup>-/-</sup> mouse livers**

|                      | <b>WT RD</b> | <b>WT HFD</b> | <b><i>Tert</i><sup>-/-</sup> RD</b> | <b><i>Tert</i><sup>-/-</sup> HFD</b> |
|----------------------|--------------|---------------|-------------------------------------|--------------------------------------|
| Glycogen rosettes    | yes          | yes           | yes                                 | yes                                  |
| Lipid droplets       | few          | large         | yes                                 | lots, large                          |
| Healthy mitochondria | yes          | yes           | yes                                 | yes                                  |
